# Supplementary material for: Immune phenotype of patients with stage IV metastatic inflammatory breast cancer
Source: Springer Nature journal article supplement (doi:10.1186/s13058-020-01371-x), 2020-12-01
Supplement: MOESM1 [file 18650428]

| <b>Fluorophore</b>         | <b>NK</b>                                | <b>Monocyte</b>                          | <b>T</b>                                 | <b>B</b>                                 | <b>Treg<br/>(Fix/Perm)</b>   | <b>Perforin/<br/>Granzyme<br/>(Fix/Perm)</b> |
|----------------------------|------------------------------------------|------------------------------------------|------------------------------------------|------------------------------------------|------------------------------|----------------------------------------------|
| FITC or Alexa<br>Fluor 488 | <b>CD56</b><br>NCAM16.2<br>(BD)          | <b>PD-1</b><br>MIH4<br>(EB)              | <b>PD-1</b><br>MIH4<br>(EB)              | <b>Lambda</b><br>MHL-38<br>(BL)          | <b>CD25</b><br>2A3<br>(BD)   | <b>Perforin</b><br>dG9<br>(BL)               |
| PE                         | <b>NKp44</b><br>P44-8<br>(BL)            | <b>CD14</b><br>HCD14<br>(BL)             | <b>CD62L</b><br>DREG-56<br>(BL)          | <b>Kappa</b><br>MHK-49<br>(BL)           |                              | <b>Granzyme B</b><br>GB11<br>(BL)            |
| APC                        | <b>NKG2D</b><br>1D11<br>(BL)             | <b>CD56</b><br>NCAM16.2<br>(BD)          | <b>CD56</b><br>NCAM16.2<br>(BD)          | <b>CD5</b><br>UCHT2<br>(BL)              | <b>FoxP3</b><br>206D<br>(EB) | <b>CD56</b><br>NCAM16.2<br>(BD)              |
| PerCP/Cy5.5                | <b>CD45</b><br>2D1<br>(BD)               | <b>CD45</b><br>2D1<br>(BD)               | <b>CD45</b><br>2D1<br>(BD)               | <b>CD45</b><br>2D1<br>(BD)               | <b>CD45</b><br>2D1<br>(BD)   | <b>CD45</b><br>2D1<br>(BD)                   |
| Cy7/APC<br>or APCH7        | <b>CD3</b><br>SK7<br>(BD)                | <b>CD3</b><br>SK7<br>(BD)                | <b>CD3</b><br>SK7<br>(BD)                | <b>CD10</b><br>HI10a<br>(BL)             | <b>CD3</b><br>SK7<br>(BD)    | <b>CD3</b><br>SK7<br>(BD)                    |
| AlexaFluor<br>700          |                                          | <b>CD16</b><br>3G8<br>(BL)               | <b>CD8</b><br>HIT8a<br>(BL)              | <b>CD27</b><br>O323<br>(BL)              | <b>CD8</b><br>HIT8a<br>(BL)  | <b>CD8</b><br>HIT8a<br>(BL)                  |
| Cy7/PE                     |                                          | <b>CD19</b><br>HIB19<br>(EB)             | <b>CD45RA</b><br>L48<br>(BD)             | <b>CD19</b><br>HIB19<br>(EB)             |                              |                                              |
| PerCP                      | <b>Propidium<br/>Iodide</b><br>100 ng/ml | <b>Propidium<br/>Iodide</b><br>100 ng/ml | <b>Propidium<br/>Iodide</b><br>100 ng/ml | <b>Propidium<br/>Iodide</b><br>100 ng/ml |                              |                                              |
| Pacific Blue               | <b>CD69</b><br>FN50<br>(BL)              | <b>CD69</b><br>FN50<br>(BL)              | <b>CD4</b><br>OKT4<br>(BL)               | <b>CD20</b><br>L27<br>(BD)               | <b>CD4</b><br>OKT4<br>(BL)   | <b>CD4</b><br>OKT4<br>(BL)                   |

**Supplementary Table S1 - Antibody Staining Panel for Flow Cytometry.** Each column represents a pool of antibodies used to stain an aliquot of PBMC with the cell type focus listed in the header. Rows designate the fluorophore label of individual antibodies as listed in the first column. The target antigens are listed in bold, followed by hybridoma clone and source (BD = BD Biosciences, San Jose, CA; EB = eBiosciences/Affymetrix, San Diego, CA; BL = Biolegend, San Diego, CA).

| <b>Myeloid Cell Parameters</b>         | <b>Lymphocyte Counts</b>      | <b>T cell Parameters</b>       |
|----------------------------------------|-------------------------------|--------------------------------|
| Classical Monocyte %                   | Total Lymphocytes per $\mu$ l | CD56+ % of T                   |
| Intermediate Monocyte %                | CD3+ T cells per $\mu$ l      | CD4+ Central Memory            |
| Non-Classical Monocytes %              | CD8+ T cells per $\mu$ l      | CD4+ Effector                  |
| Classical Monocyte PD-1 GMFI           | CD4+ cells per $\mu$ l        | CD4+ Effector Memory           |
| Intermediate Monocyte PD-1 GMFI        | CD4+ CD8+ cells per $\mu$ l   | CD4+ Naïve                     |
| Non-Classical Monocytes PD-1 GMFI      | NK cells per $\mu$ l          | CD8+ Central Memory            |
| Classical Monocyte CD69 GMFI           | B cells per $\mu$ l           | CD8+ Effector                  |
| Intermediate Monocyte CD69 GMFI        | CD4/CD8 ratio                 | CD8+ Effector Memory           |
| Non-Classical Monocyte CD69 GMFI       | CD4+ Central Memory Count     | CD8+ Naïve                     |
| Granulocytes                           | CD4+ Effector Count           | NKG2D %+                       |
| Granulocytes PD1 GMFI                  | CD4+ Effector Memory Count    | NKG2D+ GMFI                    |
| Granulocytes CD69 GMFI                 | CD4+ Naïve Count              | PD-1 GMFI                      |
| <b>NK Cell Parameters</b>              | CD8+ Central Memory Count     | CD4+ PD-1 GMFI                 |
| % CD56 <sup>bright</sup>               | CD8+ Effector Count           | CD8+ PD-1 GMFI                 |
| CD56 <sup>dim</sup> NKG2D GMFI         | CD8+ Effector Memory Count    | CD56+ T PD-1 GMFI              |
| CD56 <sup>bright</sup> NKG2D GMFI      | CD8+ Naïve Count              | CD4+ Central Memory PD-1 GMFI  |
| CD56 <sup>dim</sup> NKp44 %+           | <b>B Cell Parameters</b>      | CD4+ Effector PD-1 GMFI        |
| CD56 <sup>bright</sup> NKp44 %+        | CD20+ CD10+ Immature B cells  | CD4+ Naïve PD-1 GMFI           |
| CD56 <sup>dim</sup> CD69 GMFI          | CD20+ CD27- Naïve B cells     | CD8+ Central memory PD-1 GMFI  |
| CD56 <sup>bright</sup> CD69 GMFI       | CD20+ CD27+ Memory B cells    | CD8+ Effector PD-1 GMFI        |
| CD56 <sup>dim</sup> Perforin GMFI      | CD20- CD27+ Plasma cells      | CD8+ Effector Memory PD-1 GMFI |
| CD56 <sup>bright</sup> Perforin GMFI   |                               | CD8+ Naïve PD-1 GMFI           |
| CD56 <sup>dim</sup> Granzyme B GMFI    |                               | CD4+ Treg (FoxP3+)             |
| CD56 <sup>bright</sup> Granzyme B GMFI |                               |                                |
| CD56 <sup>dim</sup> PD-1 GMFI          |                               |                                |
| CD56 <sup>bright</sup> PD-1 GMFI       |                               |                                |
| CD56 <sup>dim</sup> CD16 GMFI          |                               |                                |
| CD56 <sup>bright</sup> CD16 GMFI       |                               |                                |
| CD56 <sup>dim</sup> NKp44 GMFI         |                               |                                |
| CD56 <sup>bright</sup> NKp44 GMFI      |                               |                                |

**Supplementary Table S2. Specific immune parameters analyzed in peripheral blood by flow cytometry.**

| Patient # | Sample collection | Blood collection | Time after blood | PD-1 score | PD-L1 score | Description                                            | Pathology report                                                                              |
|-----------|-------------------|------------------|------------------|------------|-------------|--------------------------------------------------------|-----------------------------------------------------------------------------------------------|
| 2         | Month 22          | Month 12         | 10 months        | 0          | 0           | skin, punch biopsy, left breast                        | carcinoma infiltrating dermis and dermal lymphatics consistent with breast primary            |
| 2         | Month 12          | Month 12         | same day*        | 0          | 0           | Skin, right scapula, punch biopsy                      | Poorly differentiated adenocarcinoma in dermal lymphatics                                     |
| 3         | Month 34          | Month 20         | 15 months        | 1          | 0           | Right inframammary crease, punch biopsy                | Dermis and dermal lymphatics with high grade carcinoma, consistent with breast origin         |
| 6         | Month 8           | Month 8          | same day         | 1          | 2           | skin, right upper chest, punch biopsy                  | carcinoma in dermis                                                                           |
| 7         | Month 21          | Month 21         | 8 days           | 0          | 0           | skin, left posterior shoulder, medial                  | High grade carcinoma in dermis and dermal lymphatics                                          |
| 9         | Month 4           | Month 4          | 1 day            | 3          | 3           | skin, right lateral breast, punch biopsy               | Ductal carcinoma within dermal lymphatics and invading dermis                                 |
| 9         | Month 4           | Month 4          | 20 days          | 1          | 4           | 4R lymph nodes, excision                               | metastatic carcinoma in 6/6 lymph nodes                                                       |
| 10        | Month 32          | Month 32         | same day         | 1          | 2           | skin, left chest wall, punch biopsy                    | carcinoma within dermal lymphatics, consistent with the patient's history of ductal carcinoma |
| 11        | Month 17          | Month 13         | 4 months         | 3          | 4           | skin, right chest wall, punch biopsy                   | Carcinoma with dermal lymphatics consistent with breast primary (ductal carcinoma)            |
| 11        | Month 20          | Month 13         | 5 months         | 2          | 4           | tumor- right chest wall, punch biopsy                  | high grade carcinoma in dermal lymphatics consistent with breast primary (ductal carcinoma)   |
| 13        | Month 1           | Month 1          | 3 days           | 0          | 1           | left breast core biopsy                                | invasive duct carcinoma grade III                                                             |
| 13        | Month 1           | Month 1          | 3 days           | 2          | 2           | left axillary mass, biopsy                             | Invasive ductal carcinoma grade III                                                           |
| 14        | Month 20          | Month 13         | 7 months         | 0          | 4           | liver, core needle biopsy                              | Metastatic carcinoma consistent with breast origin ER-PR-                                     |
| 15        | Month 22          | Month 22         | 4 weeks          | 0          | 1           | left breast mass, core biopsy                          | Invasive ductal carcinoma, nuclear grade 3                                                    |
| 16        | Month 27          | Month 26         | 3 days           | 2          | 4           | skin, right breast, punch biopsy                       | High grade ductal carcinoma, involves the entire dermis                                       |
| 16        | Month 32          | Month 26         | 5 months         | 1          | 2           | skin, right breast in area of mastectomy, punch biopsy | High grade ductal carcinoma, involves the dermis, with lymphatic invasion                     |

\*yellow highlighting designates IHC samples obtained within one month of blood draw

**Supplementary Table S3.** Pathological characteristics of 16 tumor samples from 11 of the metastatic IBC patients analyzed for PD-1 and PD-L1 by immunohistochemistry. Yellow highlights are IHC samples obtained within one month of blood that were used for correlation analysis shown in Figure 5.
